# Supplementary material
Source: publisher figshare collection journal article supplement (https://f1000.figshare.com/ndownloader/files/1369248)
Supplement: Supplementary file 1 [file 1369248]

Cases ,PMID/DOI,Age,Sex,Type of procedure,Post-partum state,Time to diagnosis (days),Postural headache,Change in pattern of headache,Prothrombotic condition,Presence of Multiple Sclerosis,Received heparin  or EBP prior CVST,Venous thrombosis site on imaging,Treatment for thrombosis,Response to therapy,Follow  up (months),Follow up imaging for recanalisation
"Wilder-Smith et al, 1997",9328253,26,F,Diag Lumbar puncture,No,3,Yes,Yes,"Factor V Leiden mutation, IV corticosteroids, oral contraceptive pill intake",No,No,Superior sagittal sinus ,Anticoagulation,Good,7,Yes
"Aidi et al, 1999 ",11279971,30,F,Diag Lumbar puncture,No,2,Yes,Yes,None,Yes,Epidural Blood Patch,"Superior sagittal sinus, lateral sinus ",Anticoagulation,Good,None,Not done
"Aidi et al, 1999",11279971,36,F,Diag Lumbar puncture,No,3,Yes,Yes,None,Yes,No,Superior sagittal sinus,Anticoagulation,Good,6,Not done
Albucher et al 1999,10473914,,F,Diag Lumbar puncture,No,,,,None,Yes,,,,,,
Albucher et al 1999,10473914,,M,Diag Lumbar puncture,No,,,,None,Yes,,,,,,
Albucher et al 1999,10473914,,F,Diag Lumbar puncture,No,,,,None,Yes,,,,,,
"Stadler et al , 2000",10743014,,,Diag Lumbar puncture,No,,,,,Yes,,,,Death,,
"Stadler et al , 2000",10743014,,,Diag Lumbar puncture,No,,,,,Yes,,,,,,
"Giorgetti et al , 2001",10.1007/PL00012186,34,F,Diag Lumbar puncture,No,8,Yes,Yes,None,Yes,No,"Superior sagittal sinus, transverse sinus , sigmoid sinus",Anticoagulation,Good,None,Not done
"Gunal et al , 2002",11803195,,,Diag Lumbar puncture,No,,,,,Yes,,,,,,
Mouraux et al 2002,12242562,35,F,Diag Lumbar puncture,No,2,Yes,No,None,Yes,No,,Anticoagulation,Good,6,Yes
"Benzon et al, 2003",12567347,32,M,Diag Lumbar puncture,No,,Yes,No,Lymphoblastic leukemia,,No,,Anticoagulation & epidural blood patch,Good,6,
"Vandenberghe et al, 2003",12534995,23,F,Diag Lumbar puncture,No,6,,,oral contraceptive pill intake,Yes ( IV corticosteroids),,"Superior sagittal sinus , lateral sinus, straight sinus",,Poor,,
"Vandenberghe et al, 2003",12534995,19,F,Diag Lumbar puncture,No,9,,,oral contraceptive pill intake,Yes (IV corticosteroids),,Superior sagittal sinus,,Good,,
"Pfeilschifter et al, 2009",19707734,49,F,Diag Lumbar puncture,No,5,Yes,No,Protein S & heterozygous Factor V Leiden Mutation,,No,"Superior sagittal sinus, vein of Trolard",Anticoagulation & decompressive surgery,Poor,>1,No
"Ferrante et al, 2009",19222597,19,F,Diag Lumbar puncture,No,Few days,Yes,Yes,Oral contraceptive pill intake,,No,Lateral sinus,Anticoagulation ,Good,1,Yes
"Casado-Menendez et al, 2011",21312173,44,F,Diag Lumbar puncture,No,3,Yes,Yes,None,No,No,"Superior sagittal sinus, cortical vein",Anticoagulation ,Good,None,Not done
"Ravindran et a, 1989",2774287,18,F,Epidural analgesia,Yes,10,Yes,No,Not done,no,Epidural Blood Patch,Superior sagittal sinus,None,Good,None,Yes (partial)
"Stocks et al, 2000",10793608,20,F,Epidural analgesia,Yes,7,Yes,No,None,No,Epidural Blood Patch,Cortical vein,None,Good,1,Not done
"Barrett et al , 2005",15769582,18,F,Epidural analgesia,Yes,,Yes,Yes,None,No,Epidural Blood Patch,,Anticoagulation ,Good,None,
"Karci et al, 2005",16372591,34,F,Epidural analgesia,Yes,6,No,No,Protein C deficiency,No,No,Superior sagittal sinus,Anticoagulation ,Good,None,Yes
"Kueper et al, 2008",18460011,30,F,Epidural analgesia,Yes,8,Yes,No,Heterozygous Factor V Leiden mutation,No,Epidural Blood Patch,Cortical vein,Anticoagulation ,Good,None,Not done
"Can et al, 2008",18590583,35,F,Epidural analgesia,Yes,7,No,No,Protein S deficiency,No,Epidural Blood Patch,"Superior sagittal sinus, transverse sinus, sigmoid sinus",Anticoagulation ,Good,2,Yes
"Jungmann et al, 2009",19107452,31,F,Epidural analgesia,Yes,7,Yes,Yes (6th day),Prothrombin mutation 20210A,No,Low molecular weight heparin,Superior sagittal sinus,Anticoagulation ,Good,None,Not done
"Borum et al, 1997",9054267,22,F,Epidural anesthesia,Yes,10,No,Yes,None,No,Epidural Blood Patch,Left tranverse sinus,Anticoagulation ,Good,6,Not done
"Todorov et al, 2005",16244019,23,F,Epidural anesthesia,Yes,9,Yes,Yes,Protein S deficiency,No,No,Superior sagittal sinus,Anticoagulation ,Good,5,Not done
"Kapessidou et al, 2006",16987857,21,F,Epidural anesthesia,Yes,8,No,No,None,No,No,"Superior sagittal sinus, cortical vein",Anticoagulation ,Good,3,Not done
"Katzin et al, 2007",17359517,37,F,Epidural anesthesia,Yes,4,Yes,Yes,none,No,Epidural Blood Patch,Cortical vein,Anticoagulation ,Good,3,Yes
"Yildiz et al, 2010",20504217,23,M,Epidural anesthesia,No(pilonidal sinus surgery),2,Yes,Yes,PAI-1 inhibitor mutation,No,No,Cortical vein,Anticoagulation ,Good,None,Not done
"Yildiz et al, 2010",20504217,34,M,Epidural anesthesia (inguinal hernia),No,3,Yes,No,MTHFR mutation,No,No,Cortical vein,Anticoagulation ,Good,None,Not done
"Yildiz et al, 2010",20504217,24,F,Epidural anesthesia (multiple attempts),Yes,5,Yes,No,none,No,No,Cortical vein ,Anticoagulation ,Good,None,Not done
"Milhaud et al, 2000",10809928,35,F,Epidural injection of hydrocortisone,No,4,Yes,No,Protein C deficiency,No,No,,Anticoagulation ,Good,2,Yes
"Ferrante et al , 2008",18096024,52,F,Epidural steroid & anesthetic injection,No,7,Yes,No,None,No,No,Cortical vein ,Epidural Blood Patch,Good,4,Yes
"Ghatge et al, 2008",18499437,22,F,Failed Epidural analgesia,Yes,11,Yes,Yes,Not done,No,Epidural blood patch,"Vein of Galen, superior sagittal sinus, straight sinus",Anticoagulation ,Good,None,Yes
"Grynblat et al, 1995",9338936,,F,Intradural injection steriods,No,,,,Not known,No,,,,,,
"Grynblat et al , 1995",9338936,,F,Intradural injection steriods,No,,,,Not known,No,,,,,,
"Ergan et al, 1997",9338936,34,F,Intradural injection steriods,No,,Yes,,Not known,No,No,,,,,
"Ergan et al, 1997",9338936,47,F,Intradural injection steriods,No,,Yes,,Not known,No,No,,,,,
"Bienfait et al, 2002",12428129,57,M,Intrathecal Methotrexate,No,7,Yes,No,Lymphocytic  lymphoma,No,No,,Anticoagulation ,Good,12,No
"Wilder-Smith et al, 1997",9328253,46,F,Lumbar myelography,No (back pain),Few days,Yes,Yes,None,No,No,"Superior sagittal sinus, straight sinus",Anticoagulation ,Good,6,Yes
"Wilder-Smith et al, 1997",9328253,40,M,Peridural anesthesia,No (lithotripsy),9,Yes,Yes,Factor V Leiden mutation,No,No,"Superior sagittal sinus, lateral sinus, straight sinus",Anticoagulation ,Good,3,Yes
"Wilder-Smith et al, 1997",9328253,30,F,Peridural anesthesia ,No (knee surgery),3,Yes,No,Not done,No,Unfractionated heparin,"Superior sagittal sinus, lateral sinus, straight sinus",Anticoagulation ,Death,-,
"Wilder-Smith et al, 1997",9328253,23,M,Peridural anesthesia ,No (knee surgery),9,Yes,Yes,Factor V Leiden mutation,No,Unfractionated heparin,"Superior sagittal sinus, cortical  vein",Anticoagulation ,Poor,36,Not done
"Hartley et al, 1992",1286426,51,M,Post-myelography,No,,,,,No,,,,,,
"Brugeilles et al, 1996",8880713,24,M,Post-myelography,No,,,,,No,,,,,,
"Schou et al, 1986",3963444,35,M,Spinal anesthesia,No,6,Yes,No,Not done,No,Unfractionated heparin,superior sagittal sinus,Anticoagulation ,Good,1,Not done
"Younker et al, 1986",3752549,20,F,Epidural anesthesia (2 failed attempts),Yes,7,No,No,None,No,Epidural Blood Patch,superior sagittal sinus,Anticoagulation,Good,2,Not done
Present case,,31,F,Spinal anesthesia,Yes,12,Yes,5 (yes),Protein C & S deficiency,No,Low molecular weight heparin,"superior sagittal sinus, cortical vein",Anticoagulation ,Good,3,Not done
"Miglis et al, 2010 ",19834826,45,F,Spinal surgery & lumbar drain,No,11,No ,No,None,No,No,"Lateral sinus, internal jugular vein",Anticoagulation ,Poor,None,No
"Sinha et al, 2010",19849682,25,F,Unsuccessful Epidural analgesia,Yes,9,Yes,4 (yes),Not done,No,No,Cortical vein ,Epidural blood patch,Good,1,Not done
"Albayram et al, 2009",19562828,25,F,Unsuccessful Epidural anesthesia,Yes,6,Yes,No,None,No,No,Cortical vein,Anticoagulation  & epidural blood patch,Good,1,Yes
"Hubbert et al, 1987",3826678,31,F,Epidural anesthesia (multiple attempts),Yes,4,Yes,No,Not done,No,No,Cortical vein,"Diazepam, Phenytoin, Dexamethasone",Poor,20,Not done
"Gonen et al, 2013",23813512,36,F,Unsuccessful Epidural analgesia,Yes,10,Yes,Yes,Not done,No,No,superior sagittal sinus,Anticoagulation ,Good,1,Yes
